# Supplementary material
Source: Springer Nature journal article supplement (https://www.springermedizin.de/resource/supplementary/12885_2011_3194_MOESM12_ESM.pdf/9462996)

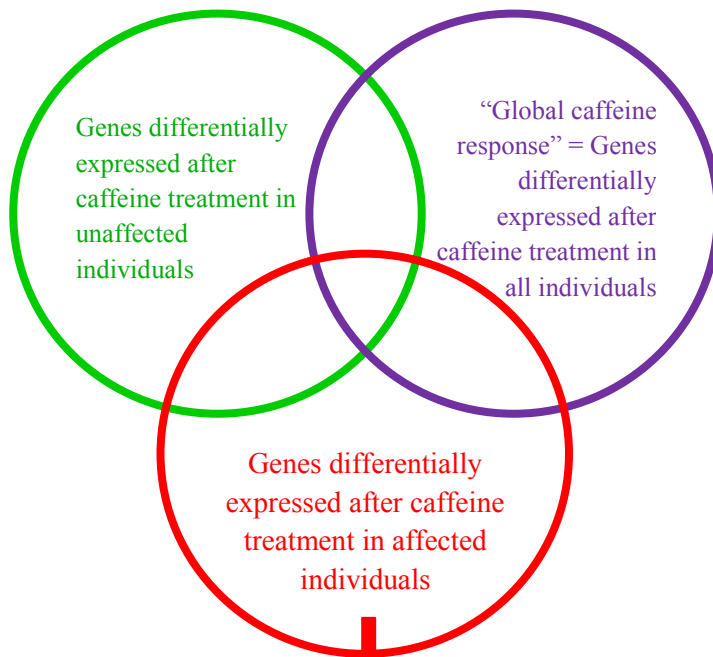

Upregulated genes selected for validation by qRT-PCR and mutation screening.

Family A

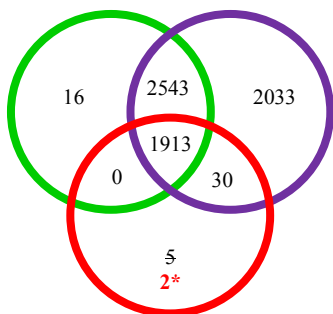

Family B

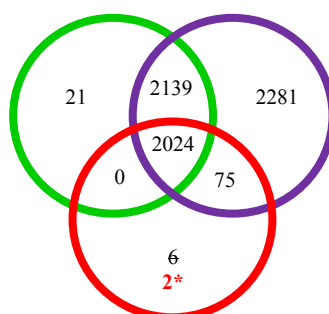

Family C

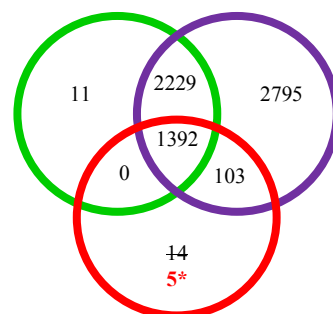

Supplement: MOESM12 [file 9462996]
